# Supplementary material
Source: PubMed Central journal article supplement (PMC524731)

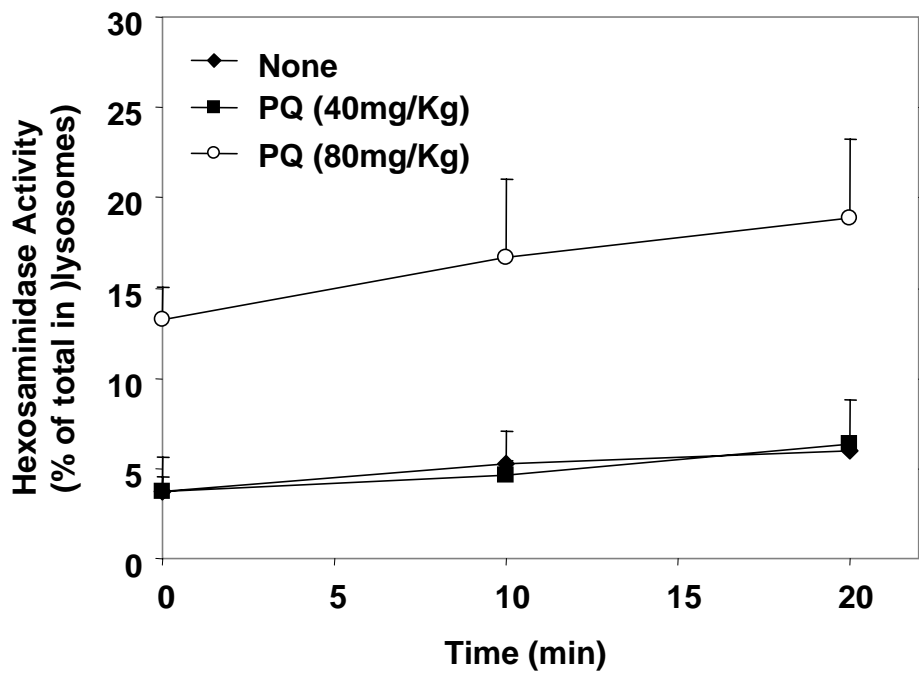

Supplement: mbc_E04-06-0477_1.pdf [file mbc_E04-06-0477_1.pdf]
